# Supplementary material for: Why and how genetic canalization evolves in gene regulatory networks
Source: PubMed Central journal article supplement (PMC5100197; doi:10.1186/s12862-016-0801-2), 2016-11-08

(2b)

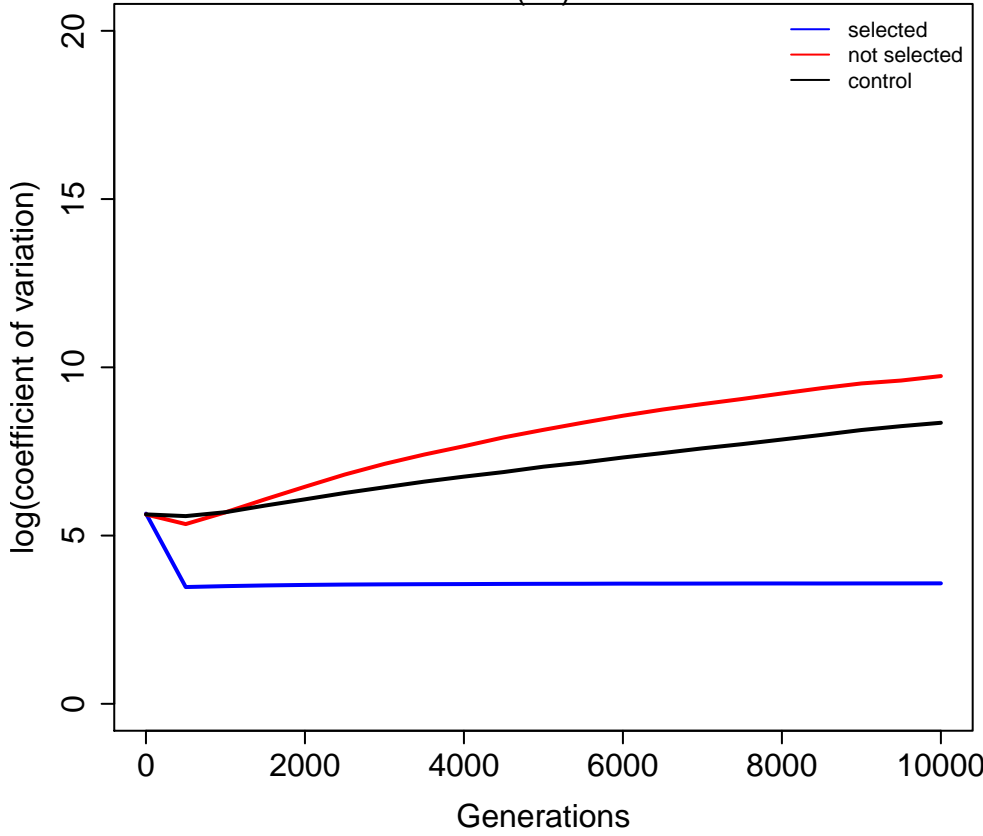

(4b)

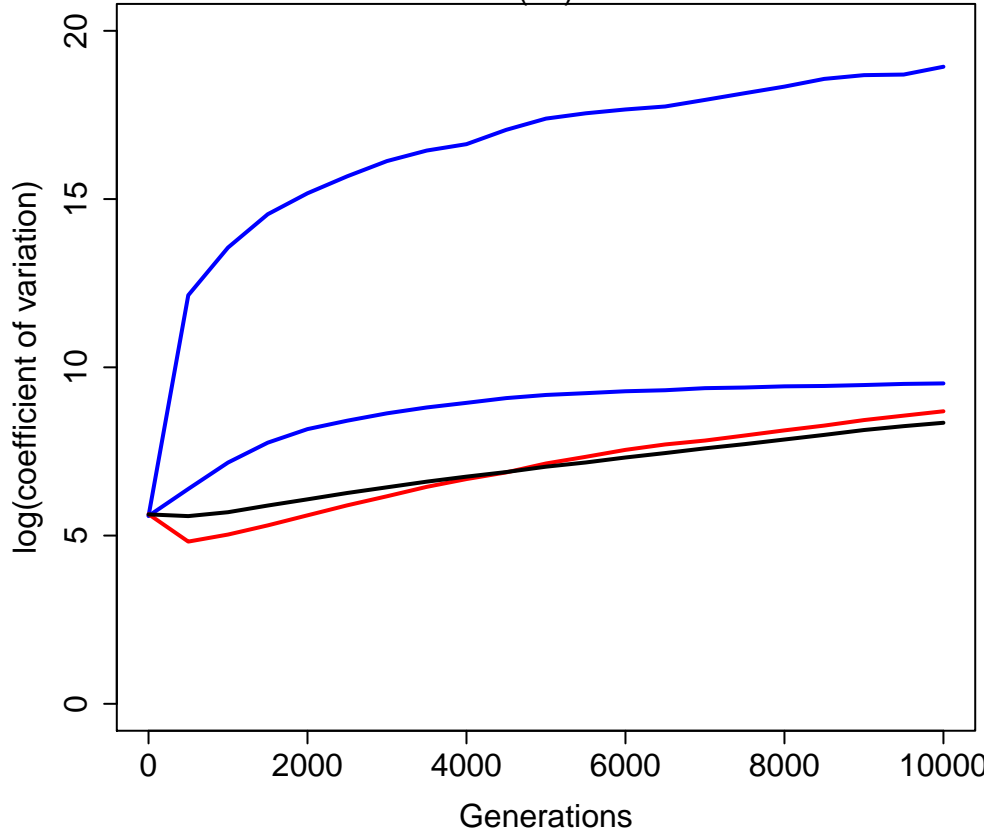

(3f)

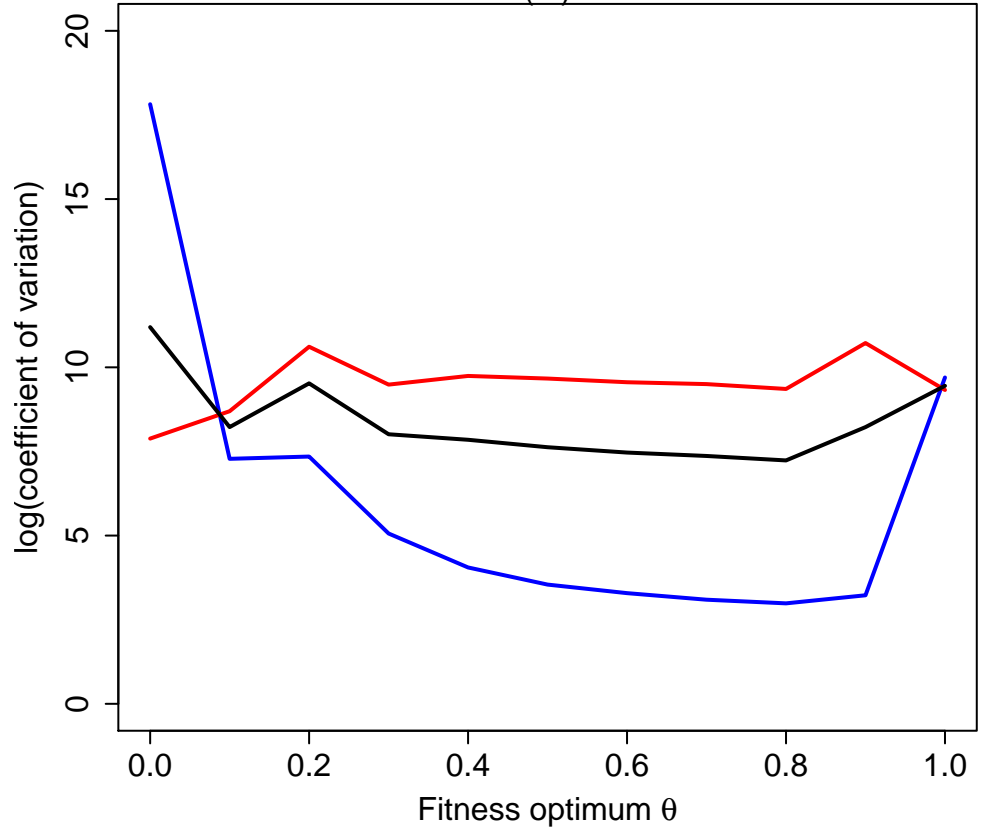

Supplement: 12862_2016_801_MOESM2_ESM.pdf [file 12862_2016_801_MOESM2_ESM.pdf]
